# Supplementary material
Source: Springer Nature journal article supplement (https://www.springermedizin.de/resource/supplementary/13046_2008_115_MOESM4_ESM.pdf/9661660)

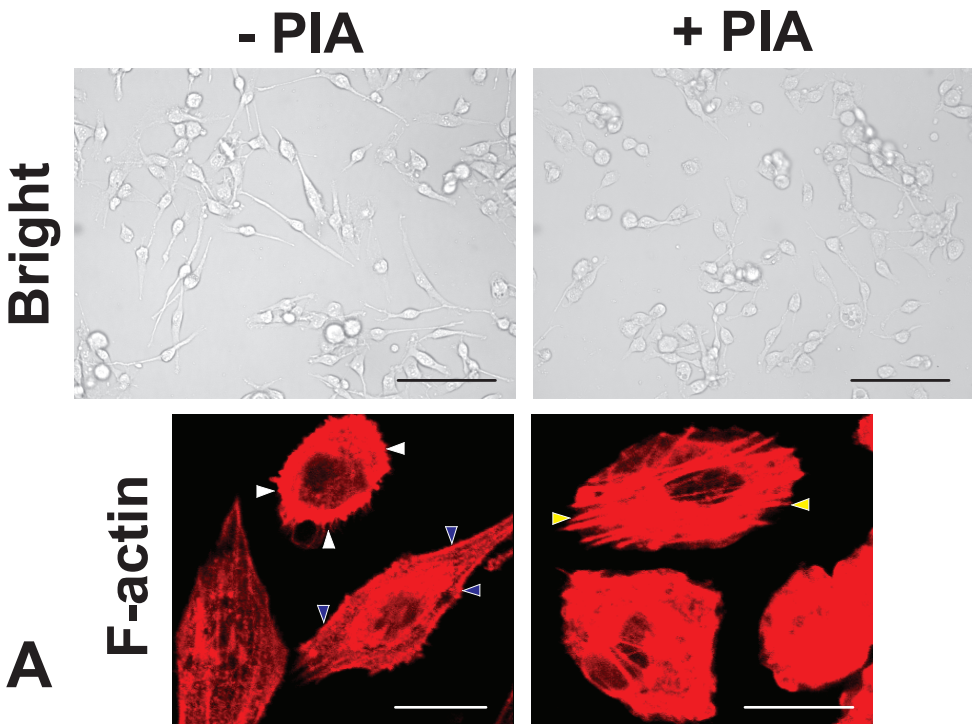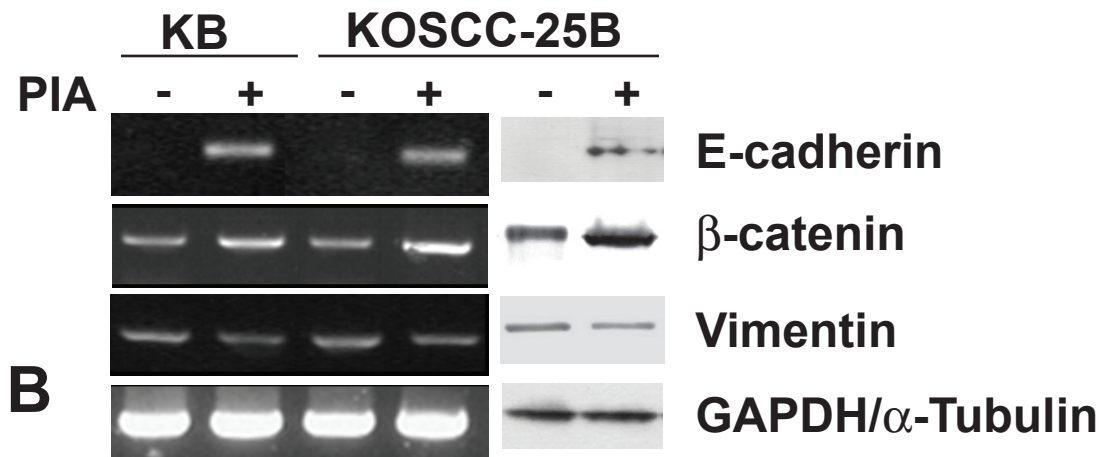

Supplement: MOESM4 [file 9661660]
